# Supplementary material for: Temperature-induced nanostructural evolution of hydrogen-rich voids in amorphous silicon: a first-principles study
Source: Royal Society of Chemistry journal article supplement (doi:10.1039/c9nr08209c), 2019-11-14
Supplement: c9nr08209c1.pdf [file c9nr08209c1.pdf]

**Supplementary Information for**  
**Temperature-induced nanostructural evolution of hydrogen-rich voids in**  
**amorphous silicon: A first-principles study**

Parthapratim Biswas,<sup>1</sup> Durga Paudel,<sup>1</sup> Raymond Atta-Fynn,<sup>2</sup> and Stephen R. Elliott<sup>3</sup>

*<sup>1</sup>Department of Physics and Astronomy,*

*The University of Southern Mississippi, Hattiesburg, Mississippi 39406, USA*

*<sup>2</sup>Department of Physics, The University of Texas at Arlington, Texas 76019, USA*

*<sup>3</sup>Department of Chemistry, University of Cambridge,*

*Cambridge CB2 1EW, United Kingdom*

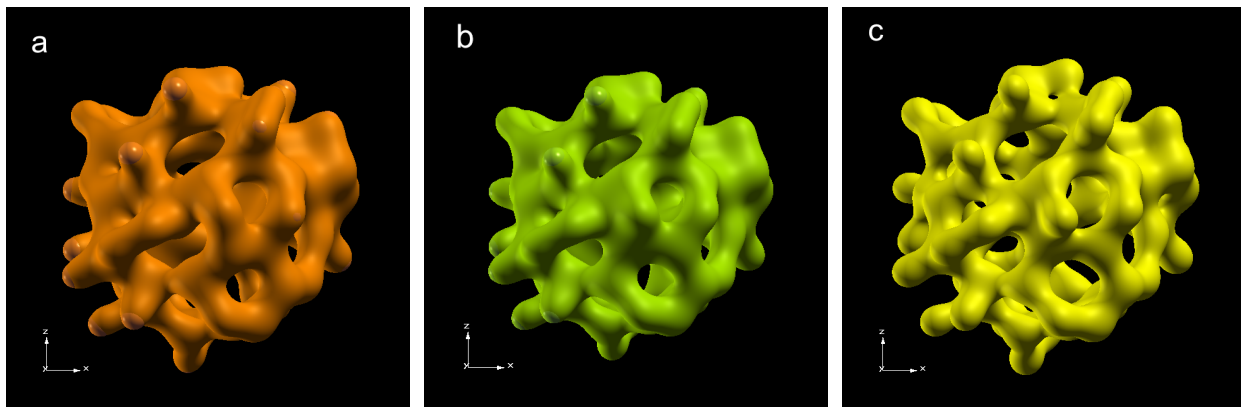

FIG. 1. A three-dimensional representation of the isosurface of a void obtained from: (a) Harris + LDA; (b) SCF + LDA; and (c) SCF + GGA. The last calculation was conducted using double-zeta (DZ) basis functions for Si atoms. The SCF + GGA yields a slightly open structure of the void, as can be seen from (c). The isosurfaces are constructed using an identical set of visualization parameters.

TABLE I. Comparison of void properties from a 1000-atom model of  $a$ -Si using Harris + LDA, SCF + LDA, and SCF + GGA.  $R_{\text{Si}}$  and  $\theta$  indicate the average Si-Si nearest-neighbor distance and bond angle on the reconstructed surface of a void of radius 5 Å.  $R_X$  and  $\Phi_S$  are the estimated linear size from the gyration radius ( $X = g$ ) and the convex-hull ( $X = H$ ) approximation, and the sphericity of the void.

| System       | Basis (Si, H) | $R_{\text{Si}}$ (Å) | $\theta$ (degree)   | $R_g$ (Å) | $R_H$ (Å) | $V_H$ (Å <sup>3</sup> ) | $\Phi_S$ |
|--------------|---------------|---------------------|---------------------|-----------|-----------|-------------------------|----------|
| Harris + LDA | SZ, DZP       | $2.443 \pm 0.069$   | $108.407 \pm 17.06$ | 6.35      | 7.12      | 1245                    | 0.61     |
| SCF + LDA    | SZ, DZP       | $2.453 \pm 0.082$   | $108.517 \pm 18.56$ | 6.31      | 7.13      | 1244                    | 0.62     |
| SCF + GGA    | DZ, DZP       | $2.457 \pm 0.084$   | $109.307 \pm 17.58$ | 6.28      | 7.15      | 1251                    | 0.59     |

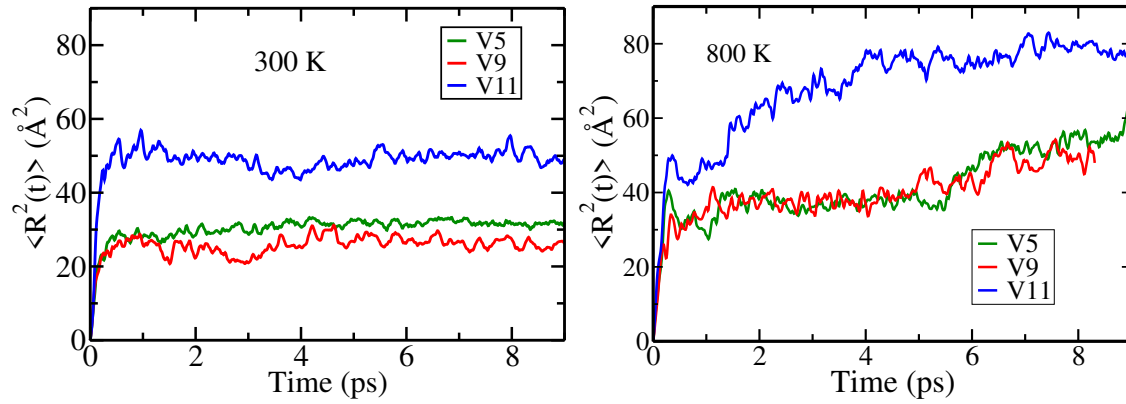

FIG. 2. The time evolution of the mean-square displacement (MSD) of hydrogen atoms inside three voids V5, V9 and V11 at 300 K (left) and 800 K (right) for a period of 8 picoseconds (ps).

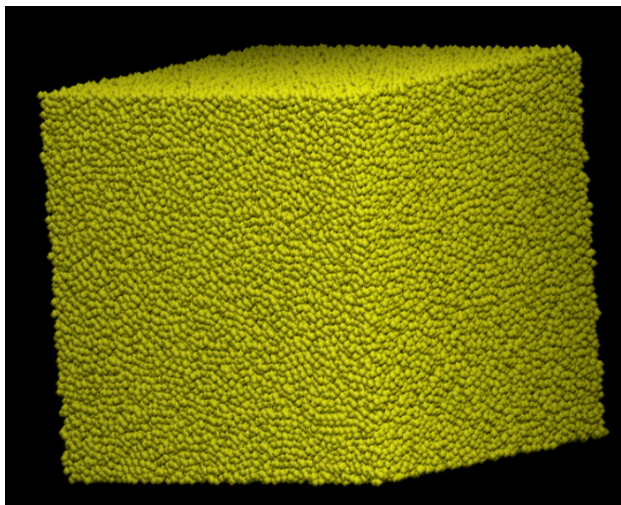

FIG. 3. The large atomistic model with 262, 400 Si atoms, which was used to generate SAXS data by introducing 12 nanometer-size voids of diameter 12 Å. The size of the model is found to be too large to render as a conventional ball-and-stick model.
